# Supplementary material
Source: publisher site journal article supplement (https://www.dovepress.com/article/268851)
Supplement: Supplementary file 1 [file get_supplementary_file.php]

**Supplementary Table 1** Reagents and primary antibodies information

| **Reagents** | **Company** | **Catalog No.** | **Application** |
| --- | --- | --- | --- |
| 4SC-202 | Selleckchem, Houston, TX, USA | S7555 | Cell culture,  0.4 μM |
| Metformin | Sigma-Aldrich, Merck KGaA, Darmstadt, Germany | PHR1084 | Cell culture,  16 mM |
| S31-201 | Selleckchem, Houston, TX, USA | S1155 | Cell culture,  40 μM, 60 μM |
| Twist1 | Abcam, Cambridge, MA, USA | ab50581 | WB, 1:1000 |
| E-cadherin antibody | Cell Signaling, Beverly, MA, USA | 3095 | WB, 1:1000 |
| N-cadherin antibody | Cell Signaling, Beverly, MA, USA | 13116 | WB, 1:1000 |
| p-STAT3 antibody | Affinity, Cincinnati, OH, USA | AF3293 | WB, 1:1000 |
| STAT3 antibody | Cell Signaling, Beverly, MA, USA | 9139 | WB, 1:1000 |
| GAPDH | Cell Signaling, Beverly, MA, USA | 5174 | WB, 1:1000 |

Note: WB, Western blot.

**Supplementary Figure 1**

| **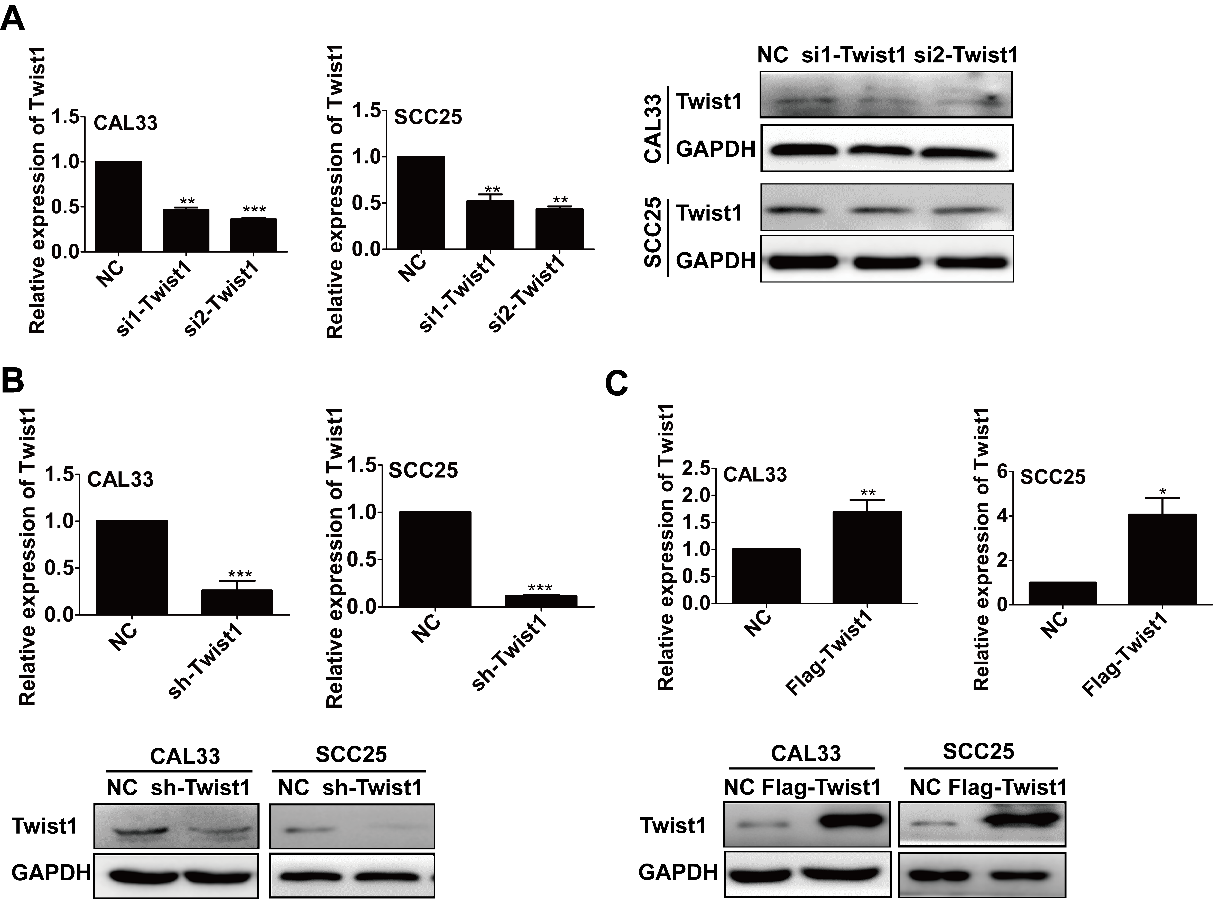** |
| --- |

**Supplementary Figure 1**. The efficiency of knockdown and overexpression of Twist1 in OSCC. ***A.*** qRT-PCR and WB were utilized to investigate the expression of Twist1 with siRNA transfection for 72 h. ***B.*** qRT-PCR and WB were utilized to investigate the expression of Twist1 with shRNA transfection. ***C.*** qRT-PCR and WB were utilized to investigate the expression of Twist1 with transfection of Flag-Twsit1. Data are shown as mean ± SD (n=3). Two-tailed Student's t-test was used. **P* < 0.05, ***P* < 0.01, ****P* < 0.001 vs NC.

| **Supplementary Figure 2** |
| --- |
| | 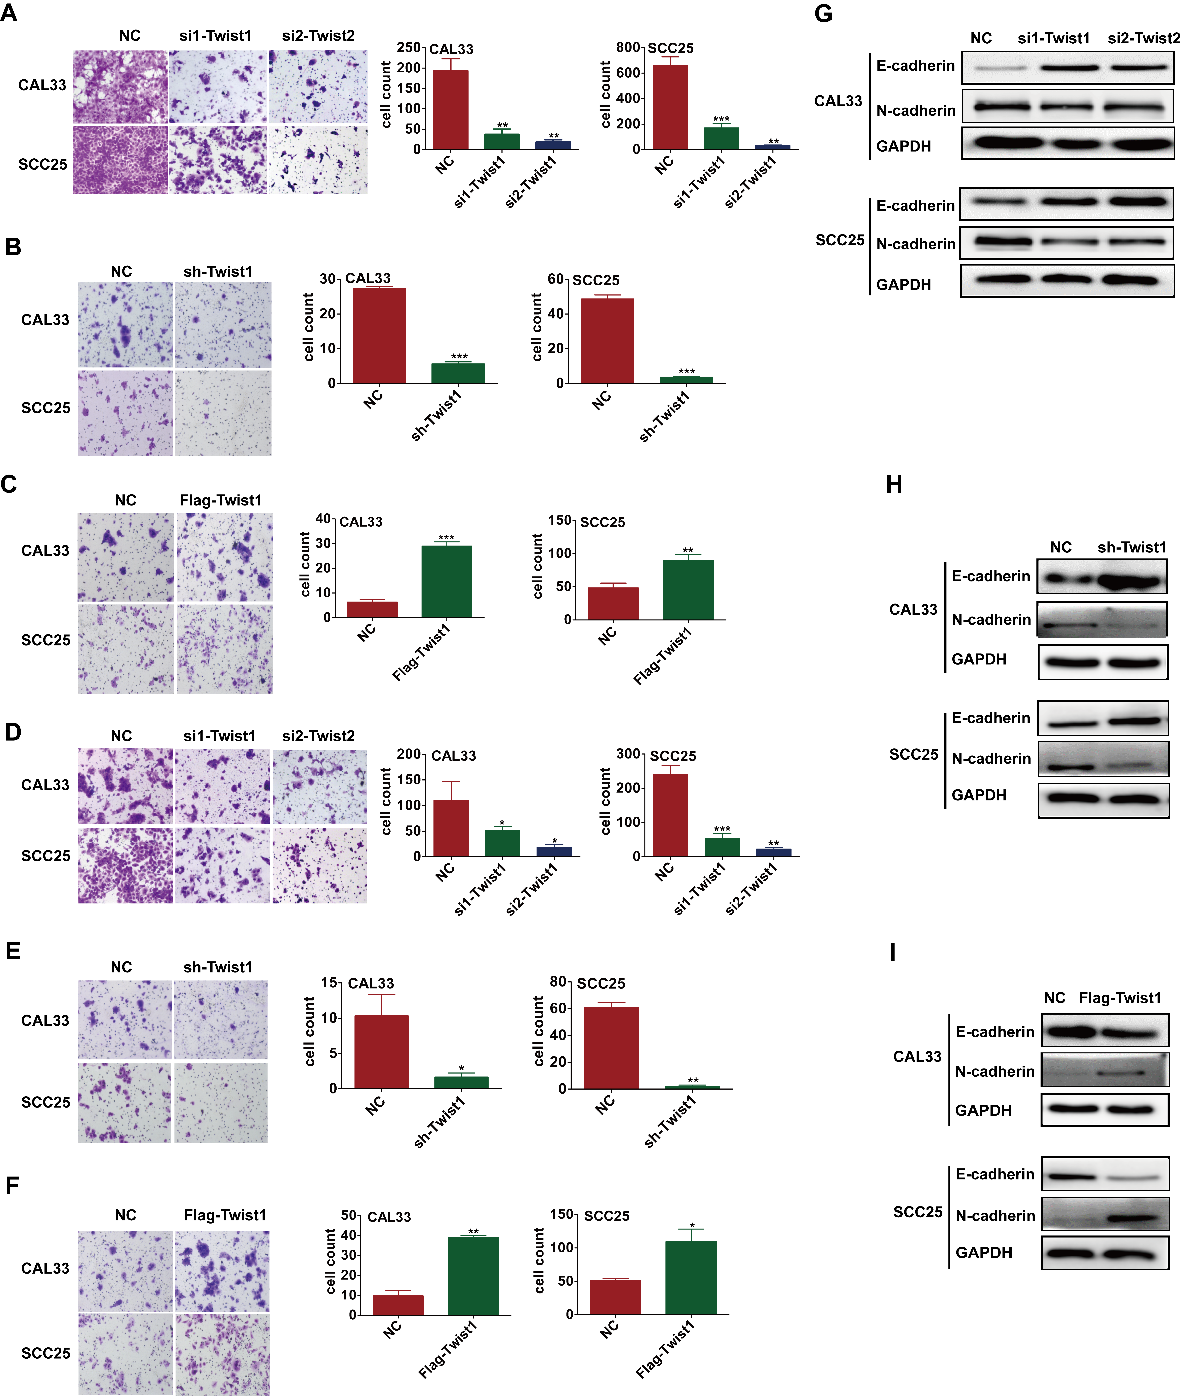 | | --- |   **Supplementary Figure 2**. Twist1 promoted the migration and invasion ability of OSCC. ***A, B.*** Transwell migration assays were performed to determine the migration ability of OSCC after transfection with si-Twist1 for 72 h or sh-Twist1, respectively. ***C.*** Transwell migration assays were performed to determine the migration of OSCC with Twist1 overexpression. ***D, E.*** Transwell invasion assays were performed to determine the migration ability of OSCC after transfection with si-Twist1 for 72 h or sh-Twist1, respectively. ***F.*** Transwell invasion assays were performed to determine the migration of OSCC with Twist1 overexpression. ***G, H.*** WB was utilized to investigate the expression of E-cadherin and N-cadherin after transfection with si-Twist1 for 72 h or sh-Twist1, respectively. ***I.*** WB was utilized to investigate the expression of E-cadherin and N-cadherin with Twist1 overexpression. GAPDH was used as internal control. Original magnification, ×100. Data are shown as mean ± SD (n=3). Two-tailed Student's t-test was used. **P* < 0.05, ***P* < 0.01, ****P* < 0.001 vs NC. | |

|  |
| --- |
